# Supplementary material for: Oxysterols protect bovine endometrial cells against pore-forming toxins from pathogenic bacteria
Source: PubMed Central journal article supplement (PMC9272411; doi:10.1096/fj.202100036r), 2021-10
Supplement: NIHMS1817176-supplement-Fig_S1.pdf [file NIHMS1817176-supplement-Fig_S1.pdf]

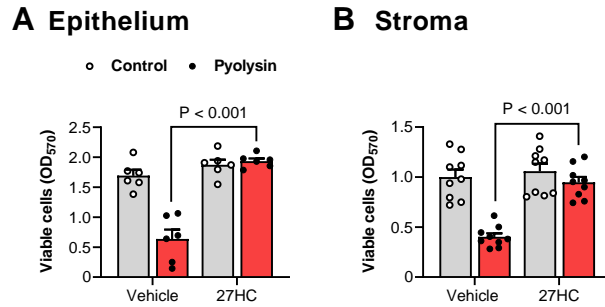

### Supplemental Figure 1. 27-hydroxycholesterol cytoprotection against pyolysin

Epithelial (A) and stromal cells (B) were cultured for 24 hours in serum-free medium containing vehicle or 25 ng/ml 27-hydroxycholesterol (27HC), and then challenged for 2 hours with control medium (■) or pyolysin (■, epithelium 200 HU, stroma 25 HU). Cell viability was determined by MTT assay. Data are presented as mean (SEM) using cells from 6 independent animals for epithelial cells and 9 animals for stromal cells; statistical significance was determined using two-way ANOVA and Bonferroni's post hoc test.
