# Supplementary material for: Oxysterols protect bovine endometrial cells against pore-forming toxins from pathogenic bacteria
Source: PubMed Central journal article supplement (PMC9272411; doi:10.1096/fj.202100036r), 2021-10
Supplement: NIHMS1817176-supplement-Fig_S3.pdf [file NIHMS1817176-supplement-Fig_S3.pdf]

## A Epithelium

○ Control ● Pyolysin

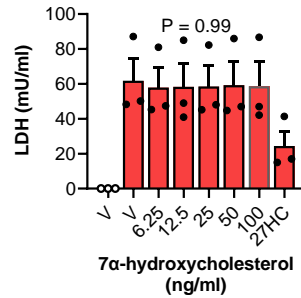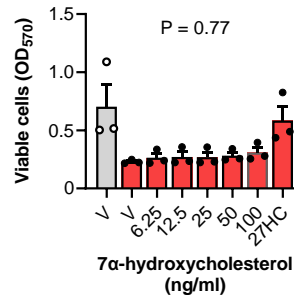

## B Stroma

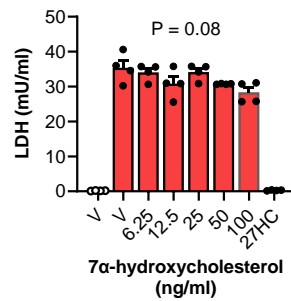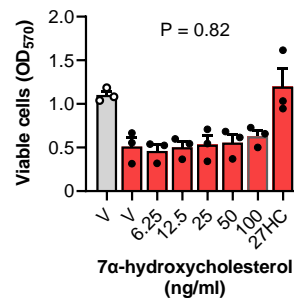

### Supplemental Figure 3. $7\alpha$ -hydroxycholesterol was not cytoprotective against pyolysin

Epithelial (A) and stromal cells (B) were cultured for 24 hours in serum-free medium containing vehicle, the indicated concentration of  $7\alpha$ -hydroxycholesterol or 25 ng/ml 27-hydroxycholesterol (27HC), and then challenged for 2 hours with control medium (■) or pyolysin (■, epithelium 200 HU, stroma 25 HU). Cell viability was determined by MTT assay. Data are presented as mean (SEM) using cells from 3 or 4 independent animals; statistical significance was determined using one-way ANOVA, and P values reported for the effect of  $7\alpha$ -hydroxycholesterol treatment on pyolysin challenge.
