# Supplementary material for: Oxysterols protect bovine endometrial cells against pore-forming toxins from pathogenic bacteria
Source: PubMed Central journal article supplement (PMC9272411; doi:10.1096/fj.202100036r), 2021-10
Supplement: NIHMS1817176-supplement-Fig_S4.pdf [file NIHMS1817176-supplement-Fig_S4.pdf]

## A Epithelium

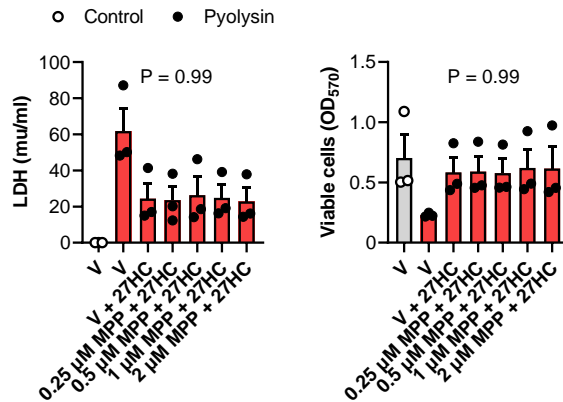

## B Stroma

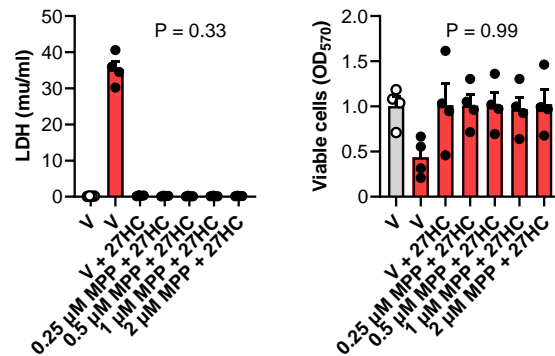

### Supplemental Figure 4. Estradiol receptor antagonist MPP dihydrochloride did not diminish 27-hydroxycholesterol cytoprotection against pyolysin

Leakage of LDH and viability of epithelial (A) and stromal cells (B) cultured for 1 hour in serum-free medium with or without the indicated concentrations of the estradiol receptor alpha antagonist MPP dihydrochloride (1,3-Bis(4-hydroxyphenyl)-4-methyl-5-[4-(2-piperidinyloxy)phenyl]-1H-pyrazole dihydrochloride), then treated with vehicle (V) or 25 ng/ml 27-hydroxycholesterol (27HC) in the continuing presence or absence of the antagonist for 24 hours, and then challenged for 2 hours with control medium (■) or pyolysin (■, epithelium 200 HU, stroma 25 HU). Data are presented as mean (SEM) using cells from 3 or 4 independent animals; statistical significance was determined using one-way ANOVA and P-values reported for the effect of the estradiol receptor antagonist on the oxysterol cytoprotection.
