# Supplementary material for: Oxysterols protect bovine endometrial cells against pore-forming toxins from pathogenic bacteria
Source: PubMed Central journal article supplement (PMC9272411; doi:10.1096/fj.202100036r), 2021-10
Supplement: NIHMS1817176-supplement-Fig_S5.pdf [file NIHMS1817176-supplement-Fig_S5.pdf]

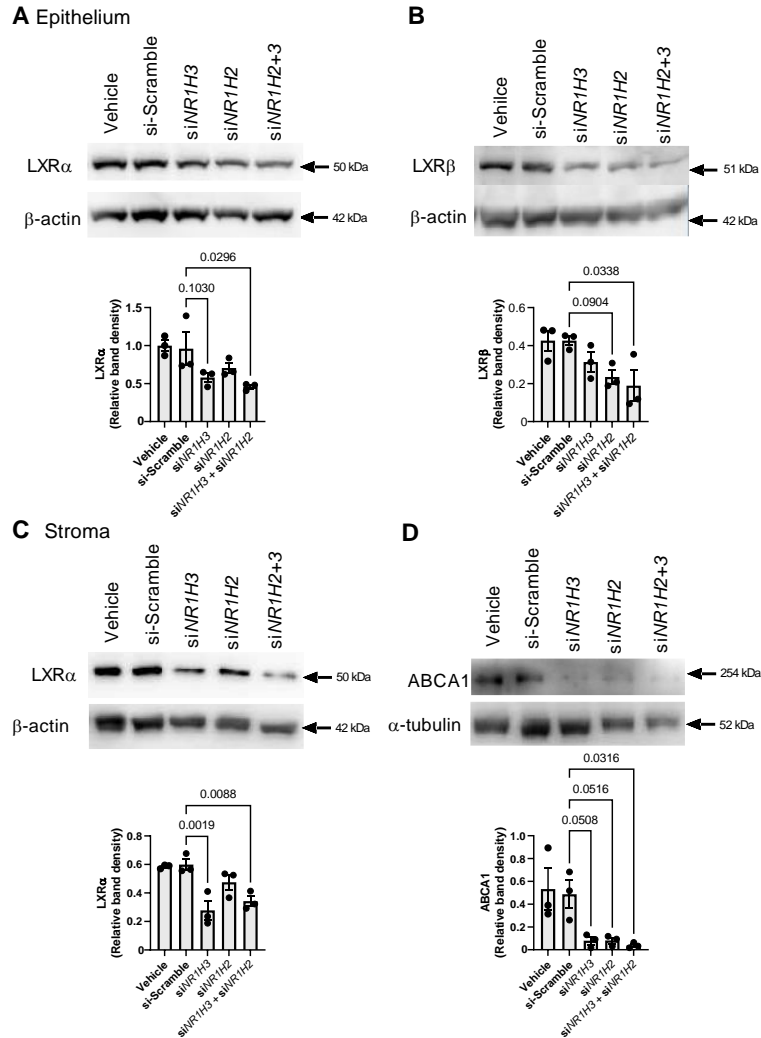

**Supplemental Figure 5. siRNA targeting *NR1H3* and *NR1H2* reduces the abundance of LXR $\alpha$ , LXR $\beta$  and ABCA1 protein.**

Epithelial (A, B) and stromal (C, D) cells were transfected for 48 hours with scramble siRNA or siRNA targeting *NR1H3*, *NR1H2*, or both *NR1H3* and *NR1H2*, and analyzed by Western blot for LXR $\alpha$  and LXR $\beta$  (epithelial cells), or LXR $\alpha$  and ABCA1 (stromal cells; Western blots for LXR $\beta$  in stromal cells had staining that precluded analysis), with  $\beta$ -actin or  $\alpha$ -tubulin as loading controls. Densitometry data (lower panels) for LXR $\alpha$  and LXR $\beta$  are normalized to  $\beta$ -actin, and densitometry data for ABCA1 are normalized to  $\alpha$ -tubulin. Data are presented as mean (SEM) using cells from 3 independent animals; statistical significance was determined using one-way ANOVA and P values reported for Dunnett's post hoc test.
